# Supplementary material for: Efficacy, economics, and sustainability of bio-based insecticides from thermochemical biorefineries
Source: Royal Society of Chemistry journal article supplement (doi:10.1039/d1gc02956h), 2021-01-01
Supplement: d1gc02956h1.pdf [file d1gc02956h1.pdf]

## Supplementary Information: Efficacy, Economics, and Sustainability of Bio-based Insecticides from Thermochemical Biorefineries

A. Nolan Wilson\*<sup>a</sup>, Matthew J. Grieshop<sup>b</sup>, Joseph Roback<sup>a</sup>, Stefano Dell'Orco<sup>a,c</sup>, Juan Huang<sup>b</sup>, Jacquelyn A. Perkins<sup>b</sup>, Scott Nicholson<sup>a</sup>, David Chiamonti<sup>d</sup>, Mark R. Nimlos<sup>a</sup>, Earl Christensen<sup>a</sup>, Kristiina Iisa<sup>a</sup>, Kylee Harris<sup>a</sup>, Abhijit Dutta<sup>a</sup>, John R. Dorgan<sup>e</sup>, Joshua A. Schaidle<sup>a</sup>

<sup>a</sup> Bio Energy Science and Technology Directorate, National Renewable Energy Laboratory, Golden, CO, USA. Email: nolan.wilson@nrel.gov

<sup>b</sup> Department of Entomology, Michigan State University, East Lansing, MI, USA.

<sup>c</sup> Department of Industrial Engineering, University of Florence, Florence, Italy.

<sup>d</sup> "Galileo Ferraris" Energy Department, Polytechnic of Turin, Torino, Italy.

<sup>e</sup> Department of Chemical Engineering and Material Science, Michigan State University, East Lansing, MI, USA.

**Supplementary Table 1:** Physiochemical properties of bio-oil, Pt/TiO<sub>2</sub> CFP Oil, and the distillate resid remaining after distillation of bio-based insecticide fractions.

| Parameter        | PtTiO <sub>2</sub> CFP Oil | Distillate Resid   | Units  |
|------------------|----------------------------|--------------------|--------|
| Carbonyl Content | 3.1±0.1                    | 1.6±0.3            | mol/kg |
| C                | 71 <sup>1</sup>            | 74                 | %      |
| H                | 7.5 <sup>1</sup>           | 6.7                | %      |
| O                | 21 <sup>1</sup>            | 20                 | %      |
| Aluminum         | ND                         | < 50               | µg/g   |
| Calcium          | ND                         | < 50               | µg/g   |
| Chromium         | ND                         | < 10               | µg/g   |
| Copper           | ND                         | < 10               | µg/g   |
| Iron             | ND                         | < 50               | µg/g   |
| Magnesium        | ND                         | < 10               | µg/g   |
| Manganese        | ND                         | < 2                | µg/g   |
| Nickel           | ND                         | < 10               | µg/g   |
| Phosphorus       | ND                         | < 100              | µg/g   |
| Potassium        | ND                         | < 50               | µg/g   |
| Sodium           | ND                         | < 50               | µg/g   |
| Sulfur           | ND                         | < 100              | µg/g   |
| Vanadium         | ND                         | < 2                | µg/g   |
| Zinc             | ND                         | < 5                | µg/g   |
| Viscosity        | <100 <sup>a</sup>          | >9300 <sup>b</sup> | cP     |

<sup>a</sup> at 20 °C, <sup>b</sup> at 95 °C

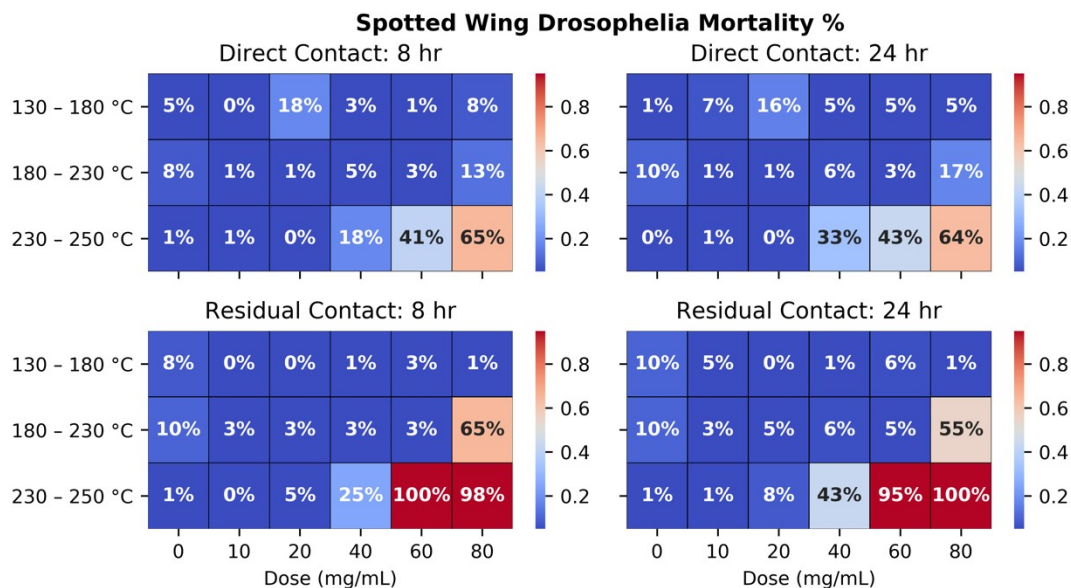

**Supplementary Figure 1:** Annotated heat maps of spotted wing drosophelia mortality. Percentages represent the average number dead (n=60) as a function of candidate bio-based insecticide fraction dose (mg/mL), boiling point range of the candidate bio-based insecticide fraction, timepoint, and testing modality (i.e., direct or residual contact).

**Supplementary Table 2:** Table of calculated LC<sub>50</sub> values for insect assays as a function of fraction, test modality, and insect model.

| Fraction     | Modality         | Insect Model                                                   | LC <sub>50</sub> (mg/mL) | LC <sub>50</sub> p-value |
|--------------|------------------|----------------------------------------------------------------|--------------------------|--------------------------|
| 130 – 180 °C | Diet             | oriental fruit moth, <i>Grapholita molesta</i> (Herbst)        | ND                       |                          |
| 180 – 230 °C | Diet             | oriental fruit moth, <i>Grapholita molesta</i> (Herbst)        | 13.1 ± 1.08              | <0.0001                  |
| 230 – 250 °C | Diet             | oriental fruit moth, <i>Grapholita molesta</i> (Herbst)        | 12.7 ± 0.94              | <0.0001                  |
| 130 – 180 °C | Direct Contact   | Spotted-wing drosophila, <i>Drosophila suzukii</i> (Matsumura) | ND                       |                          |
| 180 – 230 °C | Direct Contact   | Spotted-wing drosophila, <i>Drosophila suzukii</i> (Matsumura) | 307.7 ± 194.6            | 0.11                     |
| 230 – 250 °C | Direct Contact   | Spotted-wing drosophila, <i>Drosophila suzukii</i> (Matsumura) | 62.46 ± 3.94             | <0.0001                  |
| 130 – 180 °C | Residual Contact | Spotted-wing drosophila, <i>Drosophila suzukii</i> (Matsumura) | ND                       |                          |
| 180 – 230 °C | Residual Contact | Spotted-wing drosophila, <i>Drosophila suzukii</i> (Matsumura) | 102.23 ± 14.13           | <0.0001                  |
| 230 – 250 °C | Residual Contact | Spotted-wing drosophila, <i>Drosophila suzukii</i> (Matsumura) | 37.74 ± 1.7              | <0.0001                  |

**Supplementary Table 3:** Compositional analysis of distillate fractions as determined by GC-MS/FID. Reported values are in weight percentages.

| Class                | 130-180 °C  | 180-230 °C  | 230-250 °C  |
|----------------------|-------------|-------------|-------------|
| Phenol (0-carbon)    | 11.6        | 2.3         | 0.1         |
| Phenol (1-carbon)    | 5.4         | 7.4         | 0.5         |
| Phenol (2-carbon)    | 1.3         | 7.0         | 6.6         |
| Phenol (3-carbon)    | 0.9         | 11.4        | 18.5        |
| Phenol (4-carbon)    | -           | 4.2         | 9.9         |
| Phenol (+5-carbon)   | -           | 2.5         | 3.1         |
| Methoxyphenol        | 5           | 18.2        | 18.5        |
| Acids                | 17.7        | 0.4         | 2.3         |
| Cyclopentones        | 23.8        | 5.2         | 3.0         |
| Other                | 31.0        | 39.9        | 36.8        |
| <b>Total Closure</b> | <b>96.7</b> | <b>98.5</b> | <b>99.3</b> |

**Supplementary Table 4:** Compositional analysis of distillate fractions as determined by GC-MS/FID. Reported values are in weight percentages.

| Class              | Compound                                    | 130-180 °C | 180-230 °C | 230-250 °C |
|--------------------|---------------------------------------------|------------|------------|------------|
| Phenol (0-carbon)  | Phenol                                      | 11.6       | 2.3        | 0.1        |
| Phenol (1-carbon)  | Phenol, 2-methyl-                           | 3.3        | 1.6        | -          |
| Phenol (1-carbon)  | Phenol, 3-methyl-                           | 2.1        | 5.7        | 0.5        |
| Phenol (2-carbon)  | Phenol, 2,3-dimethyl-                       | 0.5        | 0.4        | 1          |
| Phenol (2-carbon)  | Phenol, 2-ethyl-                            | 0.4        | 1          | 0.1        |
| Phenol (2-carbon)  | Phenol, 3,5-dimethyl-                       | -          | -          | 0.2        |
| Phenol (2-carbon)  | Phenol, 3-ethyl-                            | 0.5        | 5.6        | 5.2        |
| Phenol (2-carbon)  | Phenol, 4-ethyl-                            | -          | -          | 0.2        |
| Phenol (3-carbon)  | Phenol, 2-ethyl-6-methyl-                   | 0.6        | 3.5        | 6.1        |
| Phenol (3-carbon)  | Phenol, 2-propyl-                           | -          | 0.4        | 0.5        |
| Phenol (3-carbon)  | Phenol, 3,4,5-trimethyl-                    | 0.1        | 0.2        | 0.7        |
| Phenol (3-carbon)  | Phenol, 3-propyl-                           | 0.2        | 4.5        | 9.3        |
| Phenol (3-carbon)  | Phenol, 4-(2-propenyl)-                     | -          | 2.6        | -          |
| Phenol (3-carbon)  | Phenol, 4-ethyl-2-methyl-                   | -          | -          | 1.9        |
| Phenol (3-carbon)  | p-Hydroxyphenylacetone                      | -          | -          | -          |
| Phenol (4-carbon)  | 2,5-Diethylphenol                           | -          | 1.4        | 2.3        |
| Phenol (4-carbon)  | 2-(1-Methyl-2-propenyl)phenol               | -          | 0.6        | -          |
| Phenol (4-carbon)  | 2-Allyl-4-methylphenol                      | -          | -          | 0.3        |
| Phenol (4-carbon)  | 4-Methyl-2-propylphenol                     | -          | 0.2        | 0.6        |
| Phenol (4-carbon)  | Phenol, 2,3,4,6-tetramethyl-                | -          | 0.5        | -          |
| Phenol (4-carbon)  | Phenol, 2,3,5,6-tetramethyl-                | -          | -          | 0.6        |
| Phenol (4-carbon)  | Phenol, 2-ethyl-4,5-dimethyl-               | -          | 0.8        | 2.7        |
| Phenol (4-carbon)  | Phenol, 2-methyl-5-(1-methylethyl)-         | -          | -          | 0.1        |
| Phenol (4-carbon)  | Phenol, 2-methyl-6-(2-propenyl)-            | -          | 0.1        | 0.1        |
| Phenol (4-carbon)  | Phenol, 3-methyl-6-propyl-                  | -          | 0.5        | 3          |
| Phenol (4-carbon)  | Phenol, 4-(2-methylpropyl)-                 | -          | 0.1        | -          |
| Phenol (4-carbon)  | Phenol, p-(2-methylallyl)-                  | -          | -          | 0.1        |
| Phenol (+5-carbon) | 2-Ethyl-5-n-propylphenol                    | -          | 1.4        | 2.4        |
| Phenol (+5-carbon) | Phenol, 2,5-bis(1-methylethyl)-             | -          | 0.4        | 0.7        |
| Phenol (+5-carbon) | Phenol, 2-(2-penten-4-yl)-4-methyl-         | -          | 0.7        | -          |
| Methoxyphenol      | 2-Methoxy-4-vinylphenol                     | -          | 0.6        | 0.2        |
| Methoxyphenol      | 2-Methoxy-6-methylphenol                    | -          | -          | 1.8        |
| Methoxyphenol      | 2-Methyl-6-propylphenol                     | -          | 1          | -          |
| Methoxyphenol      | 2-Propanone, 1-(4-hydroxy-3-methoxyphenyl)- | -          | -          | 0.2        |
| Methoxyphenol      | Creosol                                     | -          | 3.9        | -          |
| Methoxyphenol      | Eugenol                                     | -          | -          | 8.4        |
| Methoxyphenol      | Phenol, 2-methoxy-                          | 4.1        | 2.2        | 0.2        |
| Methoxyphenol      | Phenol, 2-methoxy-3-(2-propenyl)-           | -          | 3          | -          |
| Methoxyphenol      | Phenol, 2-methoxy-4-(1-propenyl)-           | -          | 4.9        | 3.7        |
| Methoxyphenol      | Phenol, 2-methoxy-4-propyl-                 | -          | 1.2        | 2.1        |
| Methoxyphenol      | Phenol, 4-ethyl-2-methoxy-                  | 0.2        | -          | 1.5        |
| Methoxyphenol      | Vanillin                                    | -          | -          | 0.2        |
| Methoxyphenol      | m-Guaiacol                                  | -          | -          | 0.1        |
| Acids              | 3-Butenoic acid                             | 0.4        | -          | -          |
| Acids              | 4-n-Propylbenzoic acid                      | -          | -          | 1.3        |
| Acids              | Acetic acid                                 | 6.6        | 0.4        | -          |

| Class         | Compound                                     | 130-180 °C | 180-230 °C | 230-250 °C |
|---------------|----------------------------------------------|------------|------------|------------|
| Acids         | Acetic acid ethenyl ester                    | 0.5        | -          | -          |
| Acids         | Acetic acid, (acetyloxy)-                    | 1.1        | -          | -          |
| Acids         | Acetic acid, oxo-, methyl ester              | -          | -          | -          |
| Acids         | Butanoic acid                                | 1.8        | -          | -          |
| Acids         | Crotonic acid                                | 0.1        | -          | -          |
| Acids         | Hexanoic acid                                | 0.4        | -          | -          |
| Acids         | Nonanoic acid                                | -          | -          | 0.3        |
| Acids         | Octanoic acid                                | -          | -          | 0.1        |
| Acids         | Pentanoic acid                               | 1.5        | -          | -          |
| Acids         | Pentanoic acid, 2-methyl-                    | 0.1        | -          | -          |
| Acids         | Pentanoic acid, 4-oxo-                       | -          | -          | 0.6        |
| Acids         | Propanoic acid                               | 4.8        | -          | -          |
| Acids         | Propanoic acid, 2-methyl-                    | 0.4        | -          | -          |
| Cyclopentones | 1,2-Cyclopentanedione, 3-methyl-             | -          | 1.2        | 0.8        |
| Cyclopentones | 2-Acetyl-cyclopentanone                      | -          | -          | -          |
| Cyclopentones | 2-Butyl-2-cyclopentenone                     | -          | 0.2        | -          |
| Cyclopentones | 2-Cyclopenten-1-one                          | 13.2       | 0.2        | 0.1        |
| Cyclopentones | 2-Cyclopenten-1-one, 2,3-dimethyl-           | 1.5        | 0.4        | 0.2        |
| Cyclopentones | 2-Cyclopenten-1-one, 2-hydroxy-              | 0.7        | 0.4        | -          |
| Cyclopentones | 2-Cyclopenten-1-one, 2-methyl-               | 5.5        | 0.1        | -          |
| Cyclopentones | 2-Cyclopenten-1-one, 3,4-dimethyl-           | 0.2        | -          | -          |
| Cyclopentones | 2-Cyclopenten-1-one, 3-ethyl-                | -          | 0.3        | -          |
| Cyclopentones | 2-Cyclopenten-1-one, 3-ethyl-2-hydroxy-      | -          | -          | 0.2        |
| Cyclopentones | 2-Cyclopenten-1-one, 3-methyl-               | 1          | 2.1        | 0.8        |
| Cyclopentones | 2-Ethyl-3-methylcyclopent-2-en-1-one         | 0.3        | 0.4        | 0.2        |
| Cyclopentones | 3-Ethenyl-3-methylcyclopentanone             | -          | -          | -          |
| Cyclopentones | 3-Ethylcyclopentanone                        | 0.1        | -          | -          |
| Cyclopentones | Cyclopentanone                               | 0.3        | -          | -          |
| Cyclopentones | Cyclopentanone, 2-ethyl-                     | 0.4        | -          | -          |
| Cyclopentones | Cyclopentanone, 2-methyl-                    | 0.7        | -          | -          |
| Other         | (1-Methylpenta-1,3-dienyl)benzene            | -          | -          | -          |
| Other         | (S)-(+)-2',3'-Dideoxyribonolactone           | -          | 0.2        | -          |
| Other         | 1(3H)-Isobenzofuranone                       | -          | -          | -          |
| Other         | 1,1'-Biphenyl, 2-ethyl-                      | -          | 1.1        | -          |
| Other         | 1,1'-Biphenyl, 4-methyl-                     | -          | 0.2        | -          |
| Other         | 1,1'-Biphenyl, 4-methyl-                     | -          | 0.3        | -          |
| Other         | 1,2,3-Trimethylindene                        | -          | 0.4        | -          |
| Other         | 1,2-Dipropylcyclopropene                     | -          | -          | 0.1        |
| Other         | 1,2-Ethandiol                                | 0.9        | 0.3        | -          |
| Other         | 1,3-Dioxolane, 2-(1-methylpropyl)-           | 0.2        | 0.2        | -          |
| Other         | 1,3-Pentadiene, 2-methyl-, (E)-              | 0.1        | -          | -          |
| Other         | 1,4,5,8-Tetramethylnaphthalene               | -          | 0.8        | -          |
| Other         | 1,4-Benzenediol, 2,3,5-trimethyl-            | -          | 0.3        | -          |
| Other         | 1,4-Benzenediol, 2-methyl-                   | -          | 0.4        | -          |
| Other         | 1,4-Cyclohex-2-enedione                      | -          | -          | -          |
| Other         | 1,4-Cyclohexanedione                         | -          | -          | 0.1        |
| Other         | 1,4-Dioxaspiro[4.5]decane                    | 0.1        | -          | -          |
| Other         | 1,4-Dioxin, 2,3-dihydro-                     | 0.1        | -          | -          |
| Other         | 1,4:3,6-Dianhydro- $\alpha$ -D-glucopyranose | -          | 0.4        | -          |
| Other         | 1-(p-Cumenyl)adamantane                      | -          | 0.3        | -          |
| Other         | 1-Hydroxy-2-butanone                         | 0.7        | -          | -          |
| Other         | 1-Isopropenyl-naphthalene                    | -          | 0.3        | -          |
| Other         | 1-Methylcyclooctene                          | -          | -          | 0.1        |
| Other         | 1-Naphthalenol, 2-methyl-                    | -          | 0.6        | -          |
| Other         | 1-Propanone, 1-(5-methyl-2-furanyl)-         | -          | -          | -          |
| Other         | 1H-Inden-1-ol, 2,3-dihydro-                  | -          | -          | 1.6        |
| Other         | 1H-Inden-1-ol, 2,3-dihydro-                  | -          | -          | 4.3        |
| Other         | 1H-Inden-1-one, 2,3-dihydro-                 | -          | 0.2        | 0.1        |
| Other         | 1H-Inden-1-one, 2,3-dihydro-2-methyl-        | 0.2        | -          | -          |
| Other         | 1H-Inden-1-one, 2,3-dihydro-3,3-dimethyl-    | -          | 0.1        | -          |
| Other         | 1H-Inden-5-ol, 2,3-dihydro-                  | -          | 1.8        | 0.4        |
| Other         | 1H-Indene, 1-ethyl-2,3-dihydro-              | 0.1        | -          | -          |
| Other         | 1H-Indene, 2,3-dihydro-1,2-dimethyl-         | 0.2        | -          | -          |
| Other         | 1H-Indene, 2,3-dihydro-1,3-dimethyl-         | 0.1        | -          | -          |
| Other         | 1H-Indene, 2,3-dihydro-1,6-dimethyl-         | 0.2        | -          | -          |

| Class | Compound                                 | 130-180 °C | 180-230 °C | 230-250 °C |
|-------|------------------------------------------|------------|------------|------------|
| Other | 1H-Indene, 2,3-dihydro-4-methyl-         | 0.3        | -          | -          |
| Other | 1H-Indene, 2,3-dimethyl-                 | 0.2        | 0.2        | -          |
| Other | 1H-Indene, 3-ethyl-1-(1-methylethyl)-    | -          | 0.7        | -          |
| Other | 1H-Indene, 3-methyl-                     | 0.2        | -          | -          |
| Other | 1H-Indenol                               | -          | -          | 0.2        |
| Other | 2(3H)-Benzofuranone, 3-methyl-           | -          | -          | -          |
| Other | 2(3H)-Furanone, 5-acetyldihydro-         | -          | 0.1        | -          |
| Other | 2(3H)-Furanone, 5-methyl-                | 1.6        | 0.3        | -          |
| Other | 2(3H)-Furanone, dihydro-3-methyl-        | 0.1        | -          | -          |
| Other | 2(3H)-Furanone, dihydro-5-methyl-        | 0.1        | 0.2        | -          |
| Other | 2(3H)-Furanone, dihydro-5-propyl-        | -          | -          | -          |
| Other | 2(5H)-Furanone                           | 4.3        | 1.5        | 0.3        |
| Other | 2(5H)-Furanone, 3-methyl-                | 0.2        | 1.3        | 0.2        |
| Other | 2(5H)-Furanone, 5-ethyl-                 | -          | 0.1        | -          |
| Other | 2(5H)-Furanone, 5-methyl-                | -          | 0.1        | -          |
| Other | 2,2'-Bi-1,3-dioxolane                    | -          | 0.2        | -          |
| Other | 2,2-Dimethyl-3-heptanone                 | -          | -          | 0.1        |
| Other | 2,3-Dimethyl-4-hydroxy-2-butenic lactone | -          | 0.2        | 1.1        |
| Other | 2,3-Dimethylanisole                      | 0.1        | -          | -          |
| Other | 2,4-Heptadienal, (E,E)-                  | -          | -          | 0.6        |
| Other | 2,4-Hexadiene, 2,5-dimethyl-             | -          | -          | 0.1        |
| Other | 2,5-Furandione, 3-methyl-                | -          | -          | -          |
| Other | 2,5-Furandione, dihydro-3-methyl-        | -          | -          | 0.1        |
| Other | 2,5-Hexanedione                          | -          | 0.1        | -          |
| Other | 2-Butanone                               | -          | -          | -          |
| Other | 2-Cyclohexen-1-one                       | 0.2        | -          | -          |
| Other | 2-Cyclohexen-1-one, 2-methyl-            | 0.2        | -          | -          |
| Other | 2-Cyclohexen-1-one, 3-methyl-            | -          | -          | 0.1        |
| Other | 2-Cyclohexen-1-one, 4-(1-methylethyl)-   | -          | -          | 0.2        |
| Other | 2-Ethylidenecyclohexanone                | -          | -          | 0.3        |
| Other | 2-Furancarboxaldehyde, 5-methyl-         | 2.1        | 0.1        | -          |
| Other | 2-Furanmethanol, tetrahydro-             | 0.2        | -          | -          |
| Other | 2-Furanone, 2,5-dihydro-3,5-dimethyl     | 0.2        | 0.5        | 1.2        |
| Other | 2-Hepten-4-one, 2-methyl-                | -          | -          | -          |
| Other | 2-Hexanone, 5-methyl-                    | -          | -          | -          |
| Other | 2-Hydroxy-gamma-butyrolactone            | -          | 0.4        | 0.3        |
| Other | 2-Methylindene                           | 0.2        | -          | -          |
| Other | 2-Naphthalenol                           | -          | 0.4        | -          |
| Other | 2-Propanone, 1-hydroxy-                  | 5.5        | -          | -          |
| Other | 2-Vinylfuran                             | 0.2        | -          | -          |
| Other | 2H-Pyran-2-one                           | -          | -          | -          |
| Other | 2H-Pyran-2-one, tetrahydro-              | -          | 0.6        | 1.5        |
| Other | 3,4-Anhydro-d-galactosan                 | -          | 0.3        | -          |
| Other | 3,4-Dihydro-6-methyl-2H-pyran-2-one      | -          | 0.1        | -          |
| Other | 3,4-Dimethoxytoluene                     | -          | 0.1        | 0.1        |
| Other | 3-(p-Hydroxyphenyl)-1-propanol           | -          | -          | 0.1        |
| Other | 3-Ethylanisole                           | 0.1        | -          | -          |
| Other | 3-Furaldehyde                            | 0.1        | 0.1        | -          |
| Other | 3-Hexen-2-one                            | 0.1        | -          | -          |
| Other | 3-Methyl-3-cyclohexen-1-one              | -          | -          | -          |
| Other | 3-Penten-2-one                           | -          | -          | -          |
| Other | 4-Hepten-3-one, 4-methyl-                | -          | 0.1        | 0.1        |
| Other | 4-Hexen-2-one, 3-methyl-                 | -          | -          | 0.2        |
| Other | 4-Hexen-3-one, 4,5-dimethyl-             | -          | -          | 0.1        |
| Other | 4-Methoxy-7-methylindan-1-one            | -          | 0.6        | -          |
| Other | 4-Methyl-5H-furan-2-one                  | -          | 1.3        | 4.1        |
| Other | 4H-Pyran-4-one                           | -          | -          | 0.1        |
| Other | 5-methyl-2-(Z)-hepten-4-one              | -          | -          | -          |
| Other | 6-Methoxy-1-indanone                     | -          | -          | 0.2        |
| Other | 6-Methoxy-3-methylbenzofuran             | -          | -          | 0.2        |
| Other | 6-Methyl-4-indanol                       | -          | -          | 0.5        |
| Other | 6-Oxabicyclo[3.1.0]hexan-2-one           | -          | -          | -          |
| Other | 7-Hexadecene, (Z)-                       | -          | 0.2        | -          |
| Other | 7-Methylindan-1-one                      | -          | 0.6        | -          |
| Other | Acenaphthene                             | -          | 0.4        | 0.3        |

| Class | Compound                                            | 130-180 °C | 180-230 °C | 230-250 °C |
|-------|-----------------------------------------------------|------------|------------|------------|
| Other | Acetaldehyde, hydroxy-                              | 4          | 0.2        | -          |
| Other | Acetophenone                                        | 0.1        | 0.1        | -          |
| Other | Acetophenone, 4'-hydroxy-                           | -          | 0.1        | -          |
| Other | Anisole, o-(1-ethylvinyl)-                          | -          | 1.2        | 0.4        |
| Other | Apocynin                                            | -          | 0.7        | -          |
| Other | Benzene, (2-propenyloxy)-                           | -          | -          | 0.1        |
| Other | Benzene, (4,5,5-trimethyl-1,3-cyclopentadien-1-yl)- | -          | -          | 0.2        |
| Other | Benzene, (ethenyloxy)-                              | -          | -          | 1          |
| Other | Benzene, 1,2,4,5-tetraethyl-                        | -          | 0.7        | -          |
| Other | Benzene, 1,2,4-trimethyl-5-(1-methylethyl)-         | -          | -          | -          |
| Other | Benzene, 1,3-diethyl-5-methyl-                      | -          | -          | -          |
| Other | Benzene, 1,3-dimethyl-5-(1-methylethyl)-            | 0.1        | -          | -          |
| Other | Benzene, 1-ethenyl-3-methoxy-                       | -          | -          | -          |
| Other | Benzene, 1-ethoxy-4-ethyl-                          | -          | -          | 0.2        |
| Other | Benzene, 1-methoxy-3-methyl-                        | 0.1        | -          | -          |
| Other | Benzene, 1-methoxy-4-(1-methylpropyl)-              | -          | -          | 0.4        |
| Other | Benzene, 1-methyl-4-(1-methylpropyl)-               | -          | -          | -          |
| Other | Benzene, 2-methoxy-1-methyl-4-(1-methylethyl)-      | -          | -          | 1.6        |
| Other | Benzene, 2-methoxy-4-methyl-1-(1-methylethyl)-      | -          | 1.1        | -          |
| Other | Benzene, 4-ethyl-1,2-dimethoxy-                     | -          | -          | 0.1        |
| Other | Benzeneacetaldehyde, 2-methoxy- $\nu$ t,5-dimethyl- | -          | 0.4        | 1          |
| Other | Benzeneacetaldehyde, 2-methoxy- $\nu$ t,5-dimethyl- | -          | -          | 0.2        |
| Other | Benzenemethanol, 4-(1,1-dimethylethyl)-             | -          | -          | 0.9        |
| Other | Benzofuran                                          | -          | -          | -          |
| Other | Benzofuran, 2,3-dihydro-                            | 0.1        | -          | -          |
| Other | Benzofuran, 2,3-dihydro-                            | -          | 0.2        | -          |
| Other | Benzofuran, 2,3-dihydro-2-methyl-                   | -          | 0.4        | -          |
| Other | Benzofuran, 2-methyl-                               | 0.1        | -          | -          |
| Other | Benzofuran, 4,7-dimethyl-                           | 0.2        | -          | -          |
| Other | Benzofuran, 7-methoxy-                              | -          | -          | 0.1        |
| Other | Benzofuran, 7-methyl-                               | -          | -          | 0.1        |
| Other | Bicyclo[3.1.0]hexan-2-one                           | -          | -          | -          |
| Other | Bicyclo[3.1.1]heptan-2-one                          | 0.1        | -          | -          |
| Other | Biphenyl                                            | -          | 0.1        | -          |
| Other | Butyrolactone                                       | 1.6        | 1.4        | 0.1        |
| Other | Catechol                                            | -          | 0.7        | 0.4        |
| Other | Cyclohexanone, 2-methyl-                            | 0.1        | -          | -          |
| Other | Cyclopentene, 3-ethenyl-                            | -          | -          | -          |
| Other | Dehydromevalonic lactone                            | -          | -          | 0.1        |
| Other | Estragole                                           | -          | 0.2        | 0.5        |
| Other | Ethanone, 1-(2,5-dihydroxyphenyl)-                  | -          | -          | 0.4        |
| Other | Ethanone, 1-(2-furanyl)-                            | 1.6        | -          | -          |
| Other | Ethanone, 1-(2-methylcyclopropyl)-                  | -          | 0.1        | -          |
| Other | Ethanone, 1-cyclopentyl-                            | 0.1        | -          | -          |
| Other | Ethyl-2-benzofuran                                  | 0.1        | -          | -          |
| Other | Furan, 2,3-dihydro-2,5-dimethyl-                    | -          | -          | -          |
| Other | Furan, 2,3-dihydro-4-methyl-                        | 0.1        | -          | -          |
| Other | Furan, 2-ethyl-                                     | 0.6        | -          | -          |
| Other | Furfural                                            | 1.4        | -          | -          |
| Other | Heptadecane                                         | -          | 0.1        | 0.1        |
| Other | Hydroquinone                                        | -          | 0.3        | -          |
| Other | Indan, 1-methyl-                                    | 0.1        | -          | -          |
| Other | Indane                                              | 0.1        | -          | -          |
| Other | Indene                                              | 0.1        | -          | -          |
| Other | Maltol                                              | -          | 0.1        | -          |
| Other | Methyl dehydroabietate                              | -          | 0.3        | -          |
| Other | Naphthalene                                         | 0.4        | 0.1        | -          |
| Other | Naphthalene, 1,2,3,4-tetramethyl-                   | -          | 0.2        | 0.2        |
| Other | Naphthalene, 1,2-dihydro-1,5,8-trimethyl-           | -          | -          | 0.1        |
| Other | Naphthalene, 1,2-dihydro-2,5,8-trimethyl-           | -          | 0.1        | 0.9        |
| Other | Naphthalene, 1,2-dihydro-2-methyl-                  | 0.2        | -          | -          |
| Other | Naphthalene, 1,4,6-trimethyl-                       | -          | -          | 0.4        |
| Other | Naphthalene, 1,4,6-trimethyl-                       | -          | 2.8        | 0.2        |
| Other | Naphthalene, 1,6-dimethyl-4-(1-methylethyl)-        | -          | 0.9        | -          |
| Other | Naphthalene, 1,7-dimethyl-                          | -          | 0.5        | -          |

| <b>Class</b> | <b>Compound</b>                          | <b>130-180 °C</b> | <b>180-230 °C</b> | <b>230-250 °C</b> |
|--------------|------------------------------------------|-------------------|-------------------|-------------------|
| Other        | Naphthalene, 1-ethyl-                    | -                 | 0.2               | -                 |
| Other        | Naphthalene, 1-methyl-                   | 0.2               | -                 | -                 |
| Other        | Naphthalene, 2,3-dimethyl-               | -                 | 0.2               | 0.9               |
| Other        | Naphthalene, 2-(1-methylethyl)-          | -                 | 0.4               | -                 |
| Other        | Naphthalene, 5-ethyl-1,2,3,4-tetrahydro- | -                 | -                 | -                 |
| Other        | Pentadecane                              | -                 | -                 | -                 |
| Other        | Phenanthrene                             | -                 | 0.3               | -                 |
| Other        | Prenol                                   | -                 | -                 | -                 |
| Other        | Pyridine                                 | -                 | -                 | -                 |
| Other        | Succindialdehyde                         | 0.2               | -                 | -                 |
| Other        | Toluene                                  | -                 | -                 | -                 |
| Other        | o-Cymene                                 | -                 | -                 | -                 |
| Other        | p-tert.-Butylcatechol                    | -                 | 0.4               | -                 |

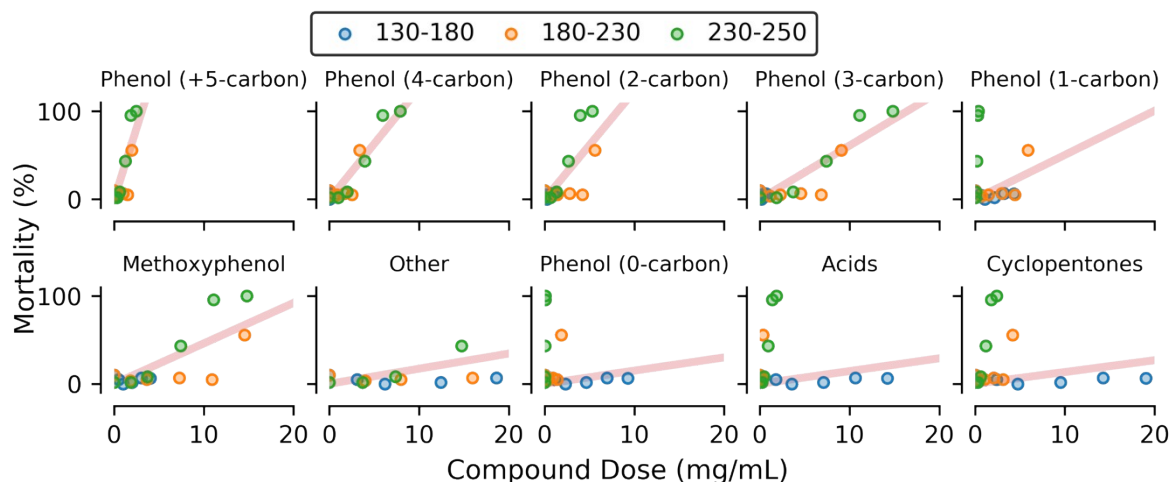

**Supplementary Figure 2:** Scatter plots showing mortality as a function of the compound dose (mg/mL), compound classification, and boiling point range of the candidate bio-based insecticide fraction. Compound dose is equal to the dose of the fraction multiplied by the weight percent for the specific compound. Blue lines represent linear regression with intercept fixed at zero.

**Supplementary Table 5:** Ordinary least squared regression results from linear fits to mortality vs. dose.  $n$  represents the number of data points.  $Slope$  is the linear coefficient from the regression. Slope error is the 95% confidence interval of the slope.  $Intercept$  was set to zero.  $R^2$  is the coefficient of determination.  $P$ -value is the probability that the slope is non-zero.

| classify           | n  | Slope       | Intercept | R-squared | P-value |
|--------------------|----|-------------|-----------|-----------|---------|
| Phenol (+5-carbon) | 12 | 32.3 ± 10.3 | 0         | 0.81      | <0.001  |
| Phenol (4-carbon)  | 18 | 12.6 ± 1.6  | 0         | 0.91      | <0.001  |
| Phenol (2-carbon)  | 18 | 12.3 ± 4.0  | 0         | 0.71      | <0.001  |
| Phenol (3-carbon)  | 18 | 6.1 ± 1.2   | 0         | 0.87      | <0.001  |
| Phenol (1-carbon)  | 18 | 5.0 ± 7.5   | 0         | 0.10      | 0.178   |
| Methoxyphenol      | 18 | 4.6 ± 1.4   | 0         | 0.73      | <0.001  |
| Other              | 18 | 1.7 ± 0.8   | 0         | 0.57      | <0.001  |
| Phenol (0-carbon)  | 18 | 1.5 ± 6.1   | 0         | 0.02      | 0.612   |
| Acids              | 18 | 1.4 ± 4.0   | 0         | 0.03      | 0.455   |
| Cyclopentones      | 18 | 1.3 ± 2.8   | 0         | 0.05      | 0.340   |



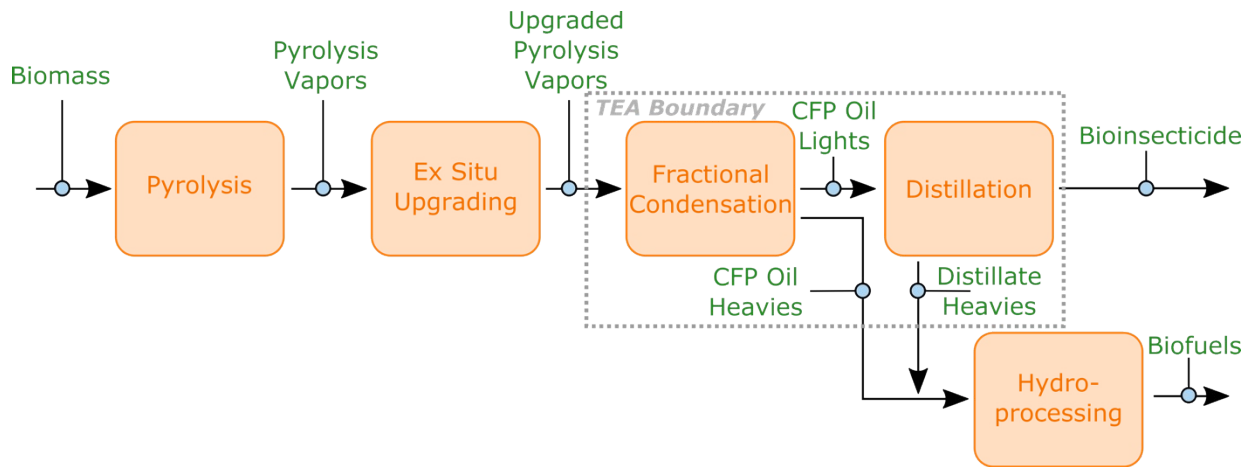

**Supplementary Figure 3:** Block flow diagram for process model. Dashed-grey line indicates analysis boundary for the bio-based insecticide. In this model catalytic fast pyrolysis oil is treated as a feedstock with associated cost. The bio-based insecticide is isolated from the oil and the remaining oil is sent to hydro-processing for fuel production.

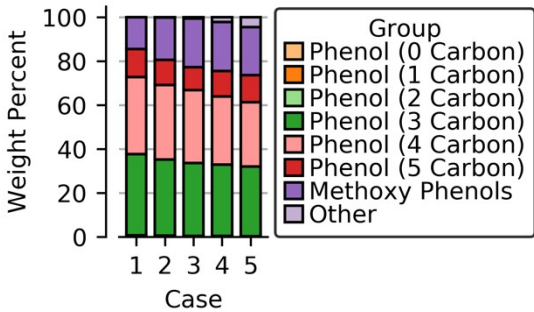

**Supplementary Figure 4:** Resulting bio-based insecticide composition, grouped by compound class, for each case considered in the techno-economic model.

**Supplementary Table 6:** Categories (CAT.) and subcategories (SUB CAT.) for the toxicological and environmental risk assessment of each compound in the candidate bio-based insecticide fractions. A brief description, the criteria that a compound was assessed against, and the data sources that were used as the basis for the assessment are provided.

| CAT.                      | SUB CAT.                              | DESCRIPTION                                                                         | CRITERIA                                                                                   | DATA SOURCE |
|---------------------------|---------------------------------------|-------------------------------------------------------------------------------------|--------------------------------------------------------------------------------------------|-------------|
| Acute Toxicity            | Who 1a                                | Extremely hazardous (Class 1a) according to WHO                                     | LD <sub>50</sub> for rats is <5 or <50 mg/kg for rat for oral or dermal, respectively      | 2,3         |
|                           | Who 1b                                | Highly hazardous (Class 1b) according to WHO                                        | LD <sub>50</sub> for rats is 5-50 or 50-200 mg/kg for rat for oral or dermal, respectively | 2,3         |
|                           | Inhalation Hazard (H330)              | Fatal if inhaled. Hazard classification according to the GHS                        | Will have hazard code H330                                                                 | 4           |
| Long Term Effects         | EPA Carcinogen                        | Human carcinogen according to EPA                                                   | Listed as group A in the EPA's Risk Assessment for Carcinogenic Effects                    | 5           |
|                           | EPA Probably Carcinogen               | Probable/ Likely carcinogen according to EPA                                        | Listed as group b in the EPA's Risk Assessment for Carcinogenic Effects                    | 5           |
|                           | IARC (WHO) Carcinogen                 | Human carcinogen according to IARC (WHO)                                            | Labeled as group 1 in Agents Classified by the IARC Monographs, Volumes 1–127              | 6           |
|                           | IARC (WHO) Probable Carcinogen        | Probable carcinogen according to IARC (WHO)                                         | Labeled as group 2a in Agents Classified by the IARC Monographs, Volumes 1–127             | 6           |
|                           | EU GHS (1A, 1B) Carcinogen            | Known or presumed human carcinogens according to EU GHS Regulation 1272/2008/EC     | Will have hazard code H350                                                                 | 3,4         |
|                           | EU GHS (1A, 1B) Mutagen               | Known or presumed mutagen according to EU Regulation 1272/2008/EC                   | Will have hazard code H340                                                                 | 3,4         |
|                           | EU GHS (1A, 1B) Reproductive Toxicant | Known or presumed reproductive toxicant according to EU GHS Regulation 1272/2008/EC | Will have hazard code H360                                                                 | 4           |
|                           | EU Potential Endocrine Disruptor      | Endocrine disruptor or potential endocrine disruptor according to EU                | Listed Annex 10 of EU endocrine disruption strategy as Category 1                          | 7           |
| Environmental Toxicity    | High Bioaccumulation                  | Compound will accumulate in the environment.                                        | Bioaccumulation Factor (BCF) >5000 or Kow logP >5 (BCF values supersede Kow logP data)     | 2,3         |
|                           | Very environmentally persistent       | Very persistent in water. Soils, or sediments.                                      | Half-life in water > 60 days. Half-life in soil or sediment > 180 days                     | 8           |
|                           | Very toxic to aqueous organisms       | Has high toxicity to aquatic life                                                   | LC <sub>50</sub> or EC <sub>50</sub> <0.1 mg/L for Daphnia species                         | 3           |
|                           | Highly toxic to bees                  | Hazard to ecosystem services – Highly toxic to bees                                 | LD50 <2 µg/bee as defined by EPA guidance                                                  | -           |
| International Conventions | Montreal Protocol                     | Ozone depleting chemical according to the Montreal Protocol                         | Listed in Montreal Protocol as ozone depleting chemical                                    | 9           |
|                           | PIC                                   | Identified as a severely hazardous pesticide and industrial chemical                | Listed in Annex III of the Rotterdam Convention                                            | 10          |
|                           | POP                                   | Identified as a persistent organic pollutant.                                       | Listed in Annex III of the Stockholm Convention                                            | 11          |

**Supplementary Table 7:** Results for toxicological and environmental risk assessment of each compound in the candidate bio-based insecticide fractions.

| Passes Criteria                                       | Passes Criteria, reason for additional concern | Insufficient data to make determination |                          |                |                         |                       |                                |                            |                         |                                   |                                  | Fails Criteria       |                           |                   |                |     |     |
|-------------------------------------------------------|------------------------------------------------|-----------------------------------------|--------------------------|----------------|-------------------------|-----------------------|--------------------------------|----------------------------|-------------------------|-----------------------------------|----------------------------------|----------------------|---------------------------|-------------------|----------------|-----|-----|
| Category                                              | Acute Toxicity                                 |                                         | Long Term Effects        |                |                         |                       |                                |                            |                         | Environmental Toxicity            |                                  |                      | International Conventions |                   |                |     |     |
|                                                       | Who 1a                                         | Who 1b                                  | Inhalation Hazard (H330) | EPA Carcinogen | EPA Probably Carcinogen | IARC (WHO) Carcinogen | IARC (WHO) Probable Carcinogen | EU GHS (1A, 1B) Carcinogen | EU GHS (1A, 1B) Mutagen | EU GHS (1A, 1B) Reproductive Tox. | EU Potential Endocrine Disruptor | High Bioaccumulation | Very tox to aq. Organism  | Highly Toxic bees | Montreal Prot. | PIC | POP |
| Subcategory                                           |                                                |                                         |                          |                |                         |                       |                                |                            |                         |                                   |                                  |                      |                           |                   |                |     |     |
| (1-Methylpenta-1,3-dienyl)benzene<br>116669-49-9      |                                                |                                         |                          |                |                         |                       |                                |                            |                         |                                   |                                  |                      |                           |                   |                |     |     |
| 1,2,3-Trimethylindene<br>4773-83-5                    |                                                |                                         |                          |                |                         |                       |                                |                            |                         |                                   |                                  |                      |                           |                   |                |     |     |
| 1,2-Dipropylcyclopropene<br>10306-92-0                |                                                |                                         |                          |                |                         |                       |                                |                            |                         |                                   |                                  |                      |                           |                   |                |     |     |
| 1,4-Cyclohexanedione<br>637-88-7                      |                                                |                                         |                          |                |                         |                       |                                |                            |                         |                                   |                                  |                      |                           |                   |                |     |     |
| 1,4:3,6-Dianhydro- $\alpha$ -D-glucopyranose<br>NA    |                                                |                                         |                          |                |                         |                       |                                |                            |                         |                                   |                                  |                      |                           |                   |                |     |     |
| 1-Methylcyclooctene<br>933-11-9                       |                                                |                                         |                          |                |                         |                       |                                |                            |                         |                                   |                                  |                      |                           |                   |                |     |     |
| 1H-Inden-1-ol, 2,3-dihydro-<br>501-92-8               |                                                |                                         |                          |                |                         |                       |                                |                            |                         |                                   |                                  |                      |                           |                   |                |     |     |
| 1H-Inden-1-one, 2,3-dihydro-<br>83-33-0               |                                                |                                         |                          |                |                         |                       |                                |                            |                         |                                   |                                  |                      |                           |                   |                |     |     |
| 1H-Indenol<br>56631-57-3                              |                                                |                                         |                          |                |                         |                       |                                |                            |                         |                                   |                                  |                      |                           |                   |                |     |     |
| 2(3H)-Furanone, 5-acetyldihydro-<br>29393-32-6        |                                                |                                         |                          |                |                         |                       |                                |                            |                         |                                   |                                  |                      |                           |                   |                |     |     |
| 2(5H)-Furanone, 3-methyl-<br>22122-36-7               |                                                |                                         |                          |                |                         |                       |                                |                            |                         |                                   |                                  |                      |                           |                   |                |     |     |
| 2(5H)-Furanone, 5-ethyl-<br>2407-43-4                 |                                                |                                         |                          |                |                         |                       |                                |                            |                         |                                   |                                  |                      |                           |                   |                |     |     |
| 2,2-Dimethyl-3-heptanone<br>19078-97-8                |                                                |                                         |                          |                |                         |                       |                                |                            |                         |                                   |                                  |                      |                           |                   |                |     |     |
| 2,3-Dimethyl-4-hydroxy-2-butenic lactone<br>1575-46-8 |                                                |                                         |                          |                |                         |                       |                                |                            |                         |                                   |                                  |                      |                           |                   |                |     |     |
| 2,4-Heptadienal, (E,E)-<br>4313-03-5                  |                                                |                                         |                          |                |                         |                       |                                |                            |                         |                                   |                                  |                      |                           |                   |                |     |     |
| 2,4-Hexadiene, 2,5-dimethyl-                          |                                                |                                         |                          |                |                         |                       |                                |                            |                         |                                   |                                  |                      |                           |                   |                |     |     |

| Category                                                 | Acute Toxicity |        |                          | Long Term Effects |                         |                       |                                |                            |                         |                                   | Environmental Toxicity           |                      |                 | International Conventions |                   |                |     |     |
|----------------------------------------------------------|----------------|--------|--------------------------|-------------------|-------------------------|-----------------------|--------------------------------|----------------------------|-------------------------|-----------------------------------|----------------------------------|----------------------|-----------------|---------------------------|-------------------|----------------|-----|-----|
|                                                          | Who 1a         | Who 1b | Inhalation Hazard (H330) | EPA Carcinogen    | EPA Probably Carcinogen | IARC (WHO) Carcinogen | IARC (WHO) Probable Carcinogen | EU GHS (1A, 1B) Carcinogen | EU GHS (1A, 1B) Mutagen | EU GHS (1A, 1B) Reproductive Tox. | EU Potential Endocrine Disruptor | High Bioaccumulation | Very persistent | Very tox to aq. Organism  | Highly Toxic bees | Montreal Prot. | PIC | POP |
| Subcategory                                              |                |        |                          |                   |                         |                       |                                |                            |                         |                                   |                                  |                      |                 |                           |                   |                |     |     |
| 764-13-6                                                 |                |        |                          |                   |                         |                       |                                |                            |                         |                                   |                                  |                      |                 |                           |                   |                |     |     |
| 2,5-Diethylphenol<br>876-20-0                            |                |        |                          |                   |                         |                       |                                |                            |                         |                                   |                                  |                      |                 |                           |                   |                |     |     |
| 2,5-Furandione, dihydro-3-methyl-<br>4100-80-5           |                |        |                          |                   |                         |                       |                                |                            |                         |                                   |                                  |                      |                 |                           |                   |                |     |     |
| 2-(1-Methyl-2-propenyl)phenol<br>18272-63-4              |                |        |                          |                   |                         |                       |                                |                            |                         |                                   |                                  |                      |                 |                           |                   |                |     |     |
| 2-Acetyl-cyclopentanone<br>60415-94-3                    |                |        |                          |                   |                         |                       |                                |                            |                         |                                   |                                  |                      |                 |                           |                   |                |     |     |
| 2-Allyl-4-methylphenol<br>6628-06-4                      |                |        |                          |                   |                         |                       |                                |                            |                         |                                   |                                  |                      |                 |                           |                   |                |     |     |
| 2-Butyl-2-cyclopentenone<br>5561-05-7                    |                |        |                          |                   |                         |                       |                                |                            |                         |                                   |                                  |                      |                 |                           |                   |                |     |     |
| 2-Cyclohexen-1-one, 3-methyl-<br>1193-18-6               |                |        |                          |                   |                         |                       |                                |                            |                         |                                   |                                  |                      |                 |                           |                   |                |     |     |
| 2-Cyclohexen-1-one, 4-(1-methylethyl)-<br>500-02-7       |                |        |                          |                   |                         |                       |                                |                            |                         |                                   |                                  |                      |                 |                           |                   |                |     |     |
| 2-Cyclopenten-1-one<br>930-30-3                          |                |        |                          |                   |                         |                       |                                |                            |                         |                                   |                                  |                      |                 |                           |                   |                |     |     |
| 2-Cyclopenten-1-one, 3-ethyl-2-hydroxy-<br>21835-01-8    |                |        |                          |                   |                         |                       |                                |                            |                         |                                   |                                  |                      |                 |                           |                   |                |     |     |
| 2-Ethyl-3-methylcyclopent-2-en-1-one<br>NA               |                |        |                          |                   |                         |                       |                                |                            |                         |                                   |                                  |                      |                 |                           |                   |                |     |     |
| 2-Ethylidenecyclohexanone<br>1122-24-3                   |                |        |                          |                   |                         |                       |                                |                            |                         |                                   |                                  |                      |                 |                           |                   |                |     |     |
| 2-Furanone, 2,5-dihydro-3,5-dimethyl<br>5584-69-0        |                |        |                          |                   |                         |                       |                                |                            |                         |                                   |                                  |                      |                 |                           |                   |                |     |     |
| 2-Hepten-4-one, 2-methyl-<br>22319-24-0                  |                |        |                          |                   |                         |                       |                                |                            |                         |                                   |                                  |                      |                 |                           |                   |                |     |     |
| 2-Hydroxy-gamma-butyrolactone<br>19444-84-9              |                |        |                          |                   |                         |                       |                                |                            |                         |                                   |                                  |                      |                 |                           |                   |                |     |     |
| 2-Methoxy-6-methylphenol<br>2896-67-5                    |                |        |                          |                   |                         |                       |                                |                            |                         |                                   |                                  |                      |                 |                           |                   |                |     |     |
| 2-Propanone, 1-(4-hydroxy-3-methoxyphenyl)-<br>2503-46-0 |                |        |                          |                   |                         |                       |                                |                            |                         |                                   |                                  |                      |                 |                           |                   |                |     |     |
| 2H-Pyran-2-one, tetrahydro-<br>542-28-9                  |                |        |                          |                   |                         |                       |                                |                            |                         |                                   |                                  |                      |                 |                           |                   |                |     |     |

| Category                                            | Acute Toxicity |        |                          | Long Term Effects |                         |                       |                                |                            |                         |                                   | Environmental Toxicity           |                      |                 | International Conventions |                   |                |     |     |
|-----------------------------------------------------|----------------|--------|--------------------------|-------------------|-------------------------|-----------------------|--------------------------------|----------------------------|-------------------------|-----------------------------------|----------------------------------|----------------------|-----------------|---------------------------|-------------------|----------------|-----|-----|
|                                                     | Who 1a         | Who 1b | Inhalation Hazard (H330) | EPA Carcinogen    | EPA Probably Carcinogen | IARC (WHO) Carcinogen | IARC (WHO) Probable Carcinogen | EU GHS (1A, 1B) Carcinogen | EU GHS (1A, 1B) Mutagen | EU GHS (1A, 1B) Reproductive Tox. | EU Potential Endocrine Disruptor | High Bioaccumulation | Very persistent | Very tox to aq. Organism  | Highly Toxic bees | Montreal Prot. | PLC | POP |
| Subcategory                                         |                |        |                          |                   |                         |                       |                                |                            |                         |                                   |                                  |                      |                 |                           |                   |                |     |     |
| 3,4-Dimethoxytoluene<br>494-99-5                    |                |        |                          |                   |                         |                       |                                |                            |                         |                                   |                                  |                      |                 |                           |                   |                |     |     |
| 3-(p-Hydroxyphenyl)-1-propanol<br>10210-17-0        |                |        |                          |                   |                         |                       |                                |                            |                         |                                   |                                  |                      |                 |                           |                   |                |     |     |
| 3-Ethenyl-3-methylcyclopentanone<br>49664-66-6      |                |        |                          |                   |                         |                       |                                |                            |                         |                                   |                                  |                      |                 |                           |                   |                |     |     |
| 3-Methyl-2-propylcyclopent-2-en-1-one<br>50397-91-6 |                |        |                          |                   |                         |                       |                                |                            |                         |                                   |                                  |                      |                 |                           |                   |                |     |     |
| 3-Methyl-3-cyclohexen-1-one<br>3524-87-6            |                |        |                          |                   |                         |                       |                                |                            |                         |                                   |                                  |                      |                 |                           |                   |                |     |     |
| 4-Hepten-3-one, 4-methyl-<br>22319-31-9             |                |        |                          |                   |                         |                       |                                |                            |                         |                                   |                                  |                      |                 |                           |                   |                |     |     |
| 4-Hexen-2-one, 3-methyl-<br>72189-24-3              |                |        |                          |                   |                         |                       |                                |                            |                         |                                   |                                  |                      |                 |                           |                   |                |     |     |
| 4-Hexen-3-one, 4,5-dimethyl-<br>17325-90-5          |                |        |                          |                   |                         |                       |                                |                            |                         |                                   |                                  |                      |                 |                           |                   |                |     |     |
| 4-Methyl-2-propylphenol<br>4074-46-8                |                |        |                          |                   |                         |                       |                                |                            |                         |                                   |                                  |                      |                 |                           |                   |                |     |     |
| 4-n-Propylbenzoic acid<br>2438-05-3                 |                |        |                          |                   |                         |                       |                                |                            |                         |                                   |                                  |                      |                 |                           |                   |                |     |     |
| 4H-Pyran-4-one<br>108-97-4                          |                |        |                          |                   |                         |                       |                                |                            |                         |                                   |                                  |                      |                 |                           |                   |                |     |     |
| 5-methyl-2-(Z)-hepten-4-one<br>24608-84-2           |                |        |                          |                   |                         |                       |                                |                            |                         |                                   |                                  |                      |                 |                           |                   |                |     |     |
| 6-Methoxy-1-indanone<br>13623-25-1                  |                |        |                          |                   |                         |                       |                                |                            |                         |                                   |                                  |                      |                 |                           |                   |                |     |     |
| 6-Methoxy-3-methylbenzofuran<br>29040-52-6          |                |        |                          |                   |                         |                       |                                |                            |                         |                                   |                                  |                      |                 |                           |                   |                |     |     |
| 6-Oxabicyclo[3.1.0]hexan-2-one<br>6705-52-8         |                |        |                          |                   |                         |                       |                                |                            |                         |                                   |                                  |                      |                 |                           |                   |                |     |     |
| Acenaphthene<br>83-32-9                             |                |        |                          |                   |                         |                       |                                |                            |                         |                                   |                                  |                      |                 |                           |                   |                |     |     |
| Anisole, o-(1-ethylvinyl)-<br>18272-74-7            |                |        |                          |                   |                         |                       |                                |                            |                         |                                   |                                  |                      |                 |                           |                   |                |     |     |
| Benzene, (2-propenyloxy)-<br>1746-13-0              |                |        |                          |                   |                         |                       |                                |                            |                         |                                   |                                  |                      |                 |                           |                   |                |     |     |
| Benzene, (4,5,5-trimethyl-1,3-cyclopentadien-1-yl)- |                |        |                          |                   |                         |                       |                                |                            |                         |                                   |                                  |                      |                 |                           |                   |                |     |     |

| Category                                                    | Acute Toxicity |        |                          | Long Term Effects |                         |                       |                                |                            |                         |                                   | Environmental Toxicity           |                      |                          | International Conventions |                   |                |     |     |
|-------------------------------------------------------------|----------------|--------|--------------------------|-------------------|-------------------------|-----------------------|--------------------------------|----------------------------|-------------------------|-----------------------------------|----------------------------------|----------------------|--------------------------|---------------------------|-------------------|----------------|-----|-----|
|                                                             | Who 1a         | Who 1b | Inhalation Hazard (H330) | EPA Carcinogen    | EPA Probably Carcinogen | IARC (WHO) Carcinogen | IARC (WHO) Probable Carcinogen | EU GHS (1A, 1B) Carcinogen | EU GHS (1A, 1B) Mutagen | EU GHS (1A, 1B) Reproductive Tox. | EU Potential Endocrine Disruptor | High Bioaccumulation | Very tox to aq. Organism | Very persistent           | Highly Toxic bees | Montreal Prot. | PLC | POP |
| Subcategory                                                 |                |        |                          |                   |                         |                       |                                |                            |                         |                                   |                                  |                      |                          |                           |                   |                |     |     |
| 33930-85-7                                                  |                |        |                          |                   |                         |                       |                                |                            |                         |                                   |                                  |                      |                          |                           |                   |                |     |     |
| Benzene, (ethenyl-oxo)-<br>766-94-9                         |                |        |                          |                   |                         |                       |                                |                            |                         |                                   |                                  |                      |                          |                           |                   |                |     |     |
| Benzene, 1,2,4-trimethyl-5-(1-methylethyl)-<br>10222-95-4   |                |        |                          |                   |                         |                       |                                |                            |                         |                                   |                                  |                      |                          |                           |                   |                |     |     |
| Benzene, 1-ethoxy-4-ethyl-<br>1585-06-4                     |                |        |                          |                   |                         |                       |                                |                            |                         |                                   |                                  |                      |                          |                           |                   |                |     |     |
| Benzene, 2-methoxy-1-methyl-4-(1-methylethyl)-<br>6379-73-3 |                |        |                          |                   |                         |                       |                                |                            |                         |                                   |                                  |                      |                          |                           |                   |                |     |     |
| Benzene, 4-ethyl-1,2-dimethoxy-<br>5888-51-7                |                |        |                          |                   |                         |                       |                                |                            |                         |                                   |                                  |                      |                          |                           |                   |                |     |     |
| 2-(2-Methoxy-5-methylphenyl)propanal<br>53155-90-1          |                |        |                          |                   |                         |                       |                                |                            |                         |                                   |                                  |                      |                          |                           |                   |                |     |     |
| Benzenemethanol, 4-(1,1-dimethylethyl)-<br>877-65-6         |                |        |                          |                   |                         |                       |                                |                            |                         |                                   |                                  |                      |                          |                           |                   |                |     |     |
| Benzofuran, 7-methoxy-<br>7168-85-6                         |                |        |                          |                   |                         |                       |                                |                            |                         |                                   |                                  |                      |                          |                           |                   |                |     |     |
| Benzofuran, 7-methyl-<br>17059-52-8                         |                |        |                          |                   |                         |                       |                                |                            |                         |                                   |                                  |                      |                          |                           |                   |                |     |     |
| Butyrolactone<br>96-48-0                                    |                |        |                          |                   |                         |                       |                                |                            |                         |                                   |                                  |                      |                          |                           |                   |                |     |     |
| Catechol<br>120-80-9                                        |                |        |                          |                   |                         |                       |                                |                            |                         |                                   |                                  |                      |                          |                           |                   |                |     |     |
| Cyclopentene, 3-ethenyl-<br>26727-45-7                      |                |        |                          |                   |                         |                       |                                |                            |                         |                                   |                                  |                      |                          |                           |                   |                |     |     |
| Dehydromevalonic lactone<br>2381-87-5                       |                |        |                          |                   |                         |                       |                                |                            |                         |                                   |                                  |                      |                          |                           |                   |                |     |     |
| Estragole<br>140-67-0                                       |                |        |                          |                   |                         |                       |                                |                            |                         |                                   |                                  |                      |                          |                           |                   |                |     |     |
| Ethanone, 1-(2,5-dihydroxyphenyl)-<br>490-78-8              |                |        |                          |                   |                         |                       |                                |                            |                         |                                   |                                  |                      |                          |                           |                   |                |     |     |
| Furan, 2,3-dihydro-2,5-dimethyl-<br>17108-52-0              |                |        |                          |                   |                         |                       |                                |                            |                         |                                   |                                  |                      |                          |                           |                   |                |     |     |
| Naphthalene, 1,2,3,4-tetramethyl-<br>3031-15-0              |                |        |                          |                   |                         |                       |                                |                            |                         |                                   |                                  |                      |                          |                           |                   |                |     |     |
| Naphthalene, 1,2-dihydro-1,5,8-trimethyl-<br>4506-36-9      |                |        |                          |                   |                         |                       |                                |                            |                         |                                   |                                  |                      |                          |                           |                   |                |     |     |

| Category                                            | Acute Toxicity |        |                          | Long Term Effects |                         |                       |                                |                            |                         |                                   | Environmental Toxicity           |                      |                 | International Conventions |                   |                |     |     |
|-----------------------------------------------------|----------------|--------|--------------------------|-------------------|-------------------------|-----------------------|--------------------------------|----------------------------|-------------------------|-----------------------------------|----------------------------------|----------------------|-----------------|---------------------------|-------------------|----------------|-----|-----|
|                                                     | Who 1a         | Who 1b | Inhalation Hazard (H330) | EPA Carcinogen    | EPA Probably Carcinogen | IARC (WHO) Carcinogen | IARC (WHO) Probable Carcinogen | EU GHS (1A, 1B) Carcinogen | EU GHS (1A, 1B) Mutagen | EU GHS (1A, 1B) Reproductive Tox. | EU Potential Endocrine Disruptor | High Bioaccumulation | Very persistent | Very tox to aq. Organism  | Highly Toxic bees | Montreal Prot. | PLC | POP |
| Subcategory                                         |                |        |                          |                   |                         |                       |                                |                            |                         |                                   |                                  |                      |                 |                           |                   |                |     |     |
| Naphthalene, 1,2-dihydro-2,5,8-trimethyl-30316-23-5 |                |        |                          |                   |                         |                       |                                |                            |                         |                                   |                                  |                      |                 |                           |                   |                |     |     |
| Naphthalene, 1,4-dihydro-2,5,8-trimethyl-30316-19-9 |                |        |                          |                   |                         |                       |                                |                            |                         |                                   |                                  |                      |                 |                           |                   |                |     |     |
| Naphthalene, 2,3-dimethyl-581-40-8                  |                |        |                          |                   |                         |                       |                                |                            |                         |                                   |                                  |                      |                 |                           |                   |                |     |     |
| Nonanoic acid 112-05-0                              |                |        |                          |                   |                         |                       |                                |                            |                         |                                   |                                  |                      |                 |                           |                   |                |     |     |
| Octanoic acid 124-07-2                              |                |        |                          |                   |                         |                       |                                |                            |                         |                                   |                                  |                      |                 |                           |                   |                |     |     |
| Pentanoic acid, 4-oxo-123-76-2                      |                |        |                          |                   |                         |                       |                                |                            |                         |                                   |                                  |                      |                 |                           |                   |                |     |     |
| Phenol, 2,3,5,6-tetramethyl-527-35-5                |                |        |                          |                   |                         |                       |                                |                            |                         |                                   |                                  |                      |                 |                           |                   |                |     |     |
| Phenol, 2,5-bis(1-methylethyl)-35946-91-9           |                |        |                          |                   |                         |                       |                                |                            |                         |                                   |                                  |                      |                 |                           |                   |                |     |     |
| Phenol, 2-ethyl-90-00-6                             |                |        |                          |                   |                         |                       |                                |                            |                         |                                   |                                  |                      |                 |                           |                   |                |     |     |
| Phenol, 2-ethyl-4,5-dimethyl-2219-78-5              |                |        |                          |                   |                         |                       |                                |                            |                         |                                   |                                  |                      |                 |                           |                   |                |     |     |
| Phenol, 2-ethyl-6-methyl-1687-64-5                  |                |        |                          |                   |                         |                       |                                |                            |                         |                                   |                                  |                      |                 |                           |                   |                |     |     |
| Phenol, 2-methoxy-4-(1-propenyl)-97-54-1            |                |        |                          |                   |                         |                       |                                |                            |                         |                                   |                                  |                      |                 |                           |                   |                |     |     |
| Phenol, 2-methyl-6-(2-propenyl)-3354-58-3           |                |        |                          |                   |                         |                       |                                |                            |                         |                                   |                                  |                      |                 |                           |                   |                |     |     |
| Phenol, 3,4,5-trimethyl-527-54-8                    |                |        |                          |                   |                         |                       |                                |                            |                         |                                   |                                  |                      |                 |                           |                   |                |     |     |
| Phenol, 3,5-dimethyl-108-68-9                       |                |        |                          |                   |                         |                       |                                |                            |                         |                                   |                                  |                      |                 |                           |                   |                |     |     |
| Phenol, 3-methyl-6-propyl-31143-55-2                |                |        |                          |                   |                         |                       |                                |                            |                         |                                   |                                  |                      |                 |                           |                   |                |     |     |
| Phenol, 3-propyl-621-27-2                           |                |        |                          |                   |                         |                       |                                |                            |                         |                                   |                                  |                      |                 |                           |                   |                |     |     |
| Phenol, 4-ethyl-123-07-9                            |                |        |                          |                   |                         |                       |                                |                            |                         |                                   |                                  |                      |                 |                           |                   |                |     |     |
| Phenol, 4-ethyl-2-methyl-                           |                |        |                          |                   |                         |                       |                                |                            |                         |                                   |                                  |                      |                 |                           |                   |                |     |     |

| Category                                            | Acute Toxicity |        |                          | Long Term Effects |                         |                       |                                |                            |                         |                                   | Environmental Toxicity           |                      |                          | International Conventions |                |     |
|-----------------------------------------------------|----------------|--------|--------------------------|-------------------|-------------------------|-----------------------|--------------------------------|----------------------------|-------------------------|-----------------------------------|----------------------------------|----------------------|--------------------------|---------------------------|----------------|-----|
|                                                     | Who 1a         | Who 1b | Inhalation Hazard (H330) | EPA Carcinogen    | EPA Probably Carcinogen | IARC (WHO) Carcinogen | IARC (WHO) Probable Carcinogen | EU GHS (1A, 1B) Carcinogen | EU GHS (1A, 1B) Mutagen | EU GHS (1A, 1B) Reproductive Tox. | EU Potential Endocrine Disruptor | High Bioaccumulation | Very tox to aq. Organism | Highly Toxic bees         | Montreal Prot. | POP |
| Subcategory                                         |                |        |                          |                   |                         |                       |                                |                            |                         |                                   |                                  |                      |                          |                           |                |     |
| 2219-73-0                                           |                |        |                          |                   |                         |                       |                                |                            |                         |                                   |                                  |                      |                          |                           |                |     |
| Phenol, p-(2-methylallyl)-<br>33641-78-0            |                |        |                          |                   |                         |                       |                                |                            |                         |                                   |                                  |                      |                          |                           |                |     |
| Vanillin<br>121-33-5                                |                |        |                          |                   |                         |                       |                                |                            |                         |                                   |                                  |                      |                          |                           |                |     |
| m-Guaiacol<br>150-19-6                              |                |        |                          |                   |                         |                       |                                |                            |                         |                                   |                                  |                      |                          |                           |                |     |
| Phenol, 2-propyl-<br>644-35-9                       |                |        |                          |                   |                         |                       |                                |                            |                         |                                   |                                  |                      |                          |                           |                |     |
| Eugenol<br>97-53-0                                  |                |        |                          |                   |                         |                       |                                |                            |                         |                                   |                                  |                      |                          |                           |                |     |
| Phenol, 3-ethyl-<br>620-17-7                        |                |        |                          |                   |                         |                       |                                |                            |                         |                                   |                                  |                      |                          |                           |                |     |
| 1H-Inden-5-ol, 2,3-dihydro-                         |                |        |                          |                   |                         |                       |                                |                            |                         |                                   |                                  |                      |                          |                           |                |     |
| 2-Ethyl-5-n-propylphenol<br>72386-20-0              |                |        |                          |                   |                         |                       |                                |                            |                         |                                   |                                  |                      |                          |                           |                |     |
| 4-Methyl-5H-furan-2-one<br>6124-79-4                |                |        |                          |                   |                         |                       |                                |                            |                         |                                   |                                  |                      |                          |                           |                |     |
| Phenol, 4-ethyl-2-methoxy-<br>2785-89-9             |                |        |                          |                   |                         |                       |                                |                            |                         |                                   |                                  |                      |                          |                           |                |     |
| Phenol, 2-methyl-5-(1-methylethyl)-<br>89-83-8      |                |        |                          |                   |                         |                       |                                |                            |                         |                                   |                                  |                      |                          |                           |                |     |
| 1,2-Cyclopentanedione, 3-methyl-<br>765-70-8        |                |        |                          |                   |                         |                       |                                |                            |                         |                                   |                                  |                      |                          |                           |                |     |
| 2(5H)-Furanone<br>497-23-4                          |                |        |                          |                   |                         |                       |                                |                            |                         |                                   |                                  |                      |                          |                           |                |     |
| 2-Cyclopenten-1-one, 2,3-dimethyl-<br>1121-05-7     |                |        |                          |                   |                         |                       |                                |                            |                         |                                   |                                  |                      |                          |                           |                |     |
| 2-Cyclopenten-1-one, 3-methyl-<br>2758-18-1         |                |        |                          |                   |                         |                       |                                |                            |                         |                                   |                                  |                      |                          |                           |                |     |
| 2-Methoxy-4-vinylphenol<br>7786-61-0                |                |        |                          |                   |                         |                       |                                |                            |                         |                                   |                                  |                      |                          |                           |                |     |
| 6-Methyl-4-indanol<br>20294-32-0                    |                |        |                          |                   |                         |                       |                                |                            |                         |                                   |                                  |                      |                          |                           |                |     |
| Benzene, 1-methoxy-4-(1-methylpropyl)-<br>4917-90-2 |                |        |                          |                   |                         |                       |                                |                            |                         |                                   |                                  |                      |                          |                           |                |     |
| Heptadecane                                         |                |        |                          |                   |                         |                       |                                |                            |                         |                                   |                                  |                      |                          |                           |                |     |



| Category                             | Acute Toxicity |        |                          | Long Term Effects |                         |                       |                                |                            |                         |                                   | Environmental Toxicity           |                      |                          | International Conventions |                   |                |     |     |
|--------------------------------------|----------------|--------|--------------------------|-------------------|-------------------------|-----------------------|--------------------------------|----------------------------|-------------------------|-----------------------------------|----------------------------------|----------------------|--------------------------|---------------------------|-------------------|----------------|-----|-----|
|                                      | Who 1a         | Who 1b | Inhalation Hazard (H330) | EPA Carcinogen    | EPA Probably Carcinogen | IARC (WHO) Carcinogen | IARC (WHO) Probable Carcinogen | EU GHS (1A, 1B) Carcinogen | EU GHS (1A, 1B) Mutagen | EU GHS (1A, 1B) Reproductive Tox. | EU Potential Endocrine Disruptor | High Bioaccumulation | Very tox to aq. Organism | Very persistent           | Highly Toxic bees | Montreal Prot. | PIC | POP |
| Subcategory                          |                |        |                          |                   |                         |                       |                                |                            |                         |                                   |                                  |                      |                          |                           |                   |                |     |     |
| 544-76-3                             |                |        |                          |                   |                         |                       |                                |                            |                         |                                   |                                  |                      |                          |                           |                   |                |     |     |
| Naphthalene, 1,4,6-trimethyl-0-00-0  |                |        |                          |                   |                         |                       |                                |                            |                         |                                   |                                  |                      |                          |                           |                   |                |     |     |
| Phenol 108-95-2                      |                |        |                          |                   |                         |                       |                                |                            |                         |                                   |                                  |                      |                          |                           |                   |                |     |     |
| Phenol, 2,3-dimethyl-526-75-0        |                |        |                          |                   |                         |                       |                                |                            |                         |                                   |                                  |                      |                          |                           |                   |                |     |     |
| Phenol, 2-methoxy-90-05-1            |                |        |                          |                   |                         |                       |                                |                            |                         |                                   |                                  |                      |                          |                           |                   |                |     |     |
| Phenol, 2-methoxy-4-propyl-2785-87-7 |                |        |                          |                   |                         |                       |                                |                            |                         |                                   |                                  |                      |                          |                           |                   |                |     |     |
| Phenol, 3-methyl-108-39-4            |                |        |                          |                   |                         |                       |                                |                            |                         |                                   |                                  |                      |                          |                           |                   |                |     |     |

**Supplementary Table 8:** Table summarizing results from toxicological and environmental risk assessment. Explanation for indication is provided.

| COMPOUND CAS                  | SUB CAT.                                               | MEETS CRITERIA OR REASON FOR CONCERN     | DESCRIPTION                                                                                                                                                                        |
|-------------------------------|--------------------------------------------------------|------------------------------------------|------------------------------------------------------------------------------------------------------------------------------------------------------------------------------------|
| 4H-Pyran-4-one<br>108-97-4    | Who 1b                                                 | Meets criteria                           | EPA TEST estimated oral rat LD <sub>50</sub> to be 100 mg/kg. If experimental data supported this estimate, this compound would meet the criteria for acute toxicity label Who 1b. |
| Catechol<br>120-80-9          | EU GHS (1A, 1B)<br>Carcinogen                          | Meets criteria                           | Known or presumed human carcinogens according to EU GHS Regulation 1272/2008/EC.                                                                                                   |
| Phenol<br>108-95-2            | Inhalation Hazard (H330)<br>EU GHS (1A, 1B)<br>Mutagen | Reason for concern<br>Reason for concern | Does not have H330 label. Has been labeled H331 - toxic if inhaled.<br>Has been labeled as GHS Category 2 (H341). Suspected of causing genetic defects.                            |
| Phenol, 3-methyl-<br>108-39-4 | EU GHS (1A, 1B)<br>Reproductive Tox.                   | Reason for concern                       | Has H361 label, suspected of damaging fertility or unborn child                                                                                                                    |

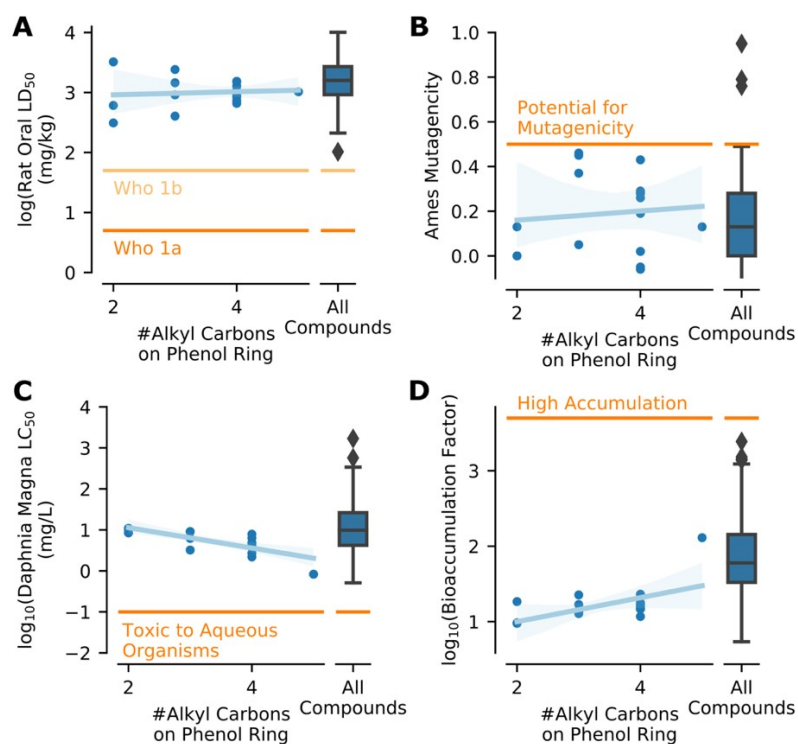

**Supplementary Figure 5:** Toxicity and environment outcomes as a function of alkyl carbons pendent to the phenol ring. Whisker plot insets use all compounds within the candidate bio-based insecticides to show data for both alkyl substituted phenols and other components found in the bio-based insecticide. **(A)** Shows the log-linear correlation between rat oral LD<sub>50</sub> and number of alkyl carbons pendent to the phenol ring. Rat oral LD<sub>50</sub> is used as a representative metric for acute toxicity. **(B)** Shows the linear correlation between the probability a compound will fail the Ames mutagenicity assay and alkyl carbons on phenol ring. The is used as a representative metric for mutagenic and cariogenic propensity. **(C)** Shows the log-linear correlation between Daphnia Magna LC<sub>50</sub> and number of alkyl carbons pendent to the phenol ring. The LC<sub>50</sub> value for is used as a representative metric for aqueous organism toxicity. **(D)** Shows the log-linear correlation between bioaccumulation factor and number of alkyl carbons pendent to the phenol ring. Bioaccumulation factor measures the degree to which a compound will accumulate in organisms. It is the ratio of the compound's concentration in an organism to the concentration in the environment and accounts for uptake via ingestion and respiration.

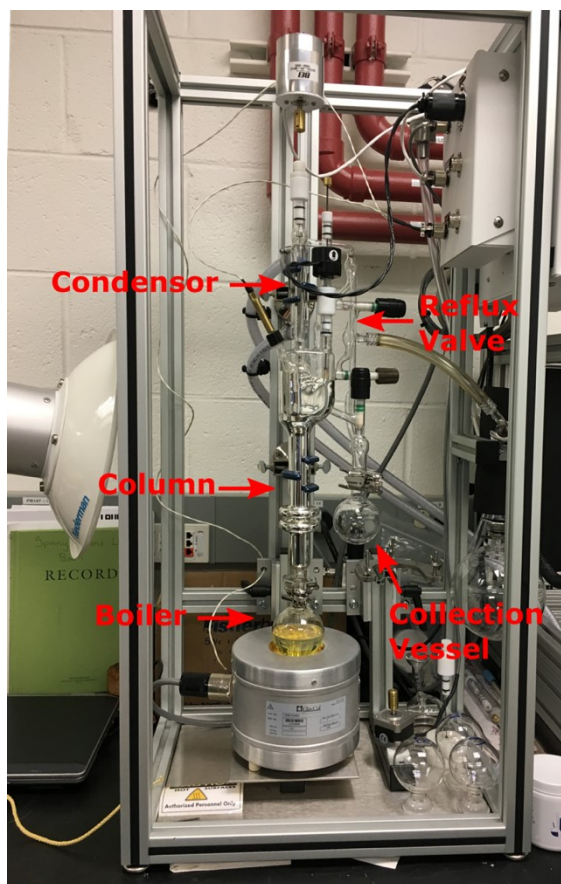

**Supplementary Figure 6:** Spinning band distillation column used to isolate bio-based insecticides from catalytic fast pyrolysis oils.

**Supplementary Table 9:** GC×GC method parameters.

| Column                                   |                                                                |                     |                |
|------------------------------------------|----------------------------------------------------------------|---------------------|----------------|
| Primary                                  | Rxi-17Sil, 20 m x 180 $\mu\text{m}$ x 0.18 $\mu\text{m}$       |                     |                |
| Secondary                                | ZB-5HT Inferno, 1.5 m x 180 $\mu\text{m}$ x 0.10 $\mu\text{m}$ |                     |                |
| Injector                                 |                                                                |                     |                |
| 1.0 $\mu\text{L}$ injection, split 200:1 | 300°C                                                          |                     |                |
| Oven                                     |                                                                |                     |                |
| Primary                                  | 35°C, hold 5 min, ramp 5°C/min to 325°C, hold 1 min            |                     |                |
| Secondary                                | 15°C offset from primary                                       |                     |                |
| Modulator                                | 15°C offset from secondary                                     |                     |                |
| Modulator cycle timing                   | modulator period, sec                                          | hot pulse time, sec | cold time, sec |
|                                          | 8                                                              | 3.0                 | 1.0            |
| Mass Spectrometer                        |                                                                |                     |                |
| Transfer line                            | 350°C                                                          |                     |                |
| TOF mass range                           | m/z 29-600                                                     |                     |                |
| TOF acquisition rate                     | 200 spectra/sec                                                |                     |                |
| Solvent delay                            | 65 s                                                           |                     |                |
| FID                                      |                                                                |                     |                |
| Transfer line                            | 350°C                                                          |                     |                |
| H <sub>2</sub> Flow                      | 40 sccm                                                        |                     |                |
| Air Flow                                 | 300 sccm                                                       |                     |                |
| N <sub>2</sub> Makeup Flow               | 25 sccm                                                        |                     |                |

## SI References

- 1 R. J. French, K. Lisa, K. A. Orton, M. B. Griffin, E. Christensen, S. Black, K. Brown, S. E. Palmer, J. A. Schaidle, C. Mukarakate and T. D. Foust, *ACS Sustain. Chem. Eng.*, 2021, **9**, 1235–1245.
- 2 S. Kim, J. Chen, T. Cheng, A. Gindulyte, J. He, S. He, Q. Li, B. A. Shoemaker, P. A. Thiessen, B. Yu, L. Zaslavsky, J. Zhang and E. E. Bolton, *Nucleic Acids Res.*, 2019, **47**, D1102–D1109.
- 3 T. Martin, P. Harten and D. Young, *U.S. Environ. Prot. Agency, Washington, DC, EPA/600/C-12/006*.
- 4 European Chemicals Agency, ECHA Database - Information on Chemicals, <https://echa.europa.eu/home>, (accessed 20 December 2020).
- 5 United States Environmental Protection Agency, *Risk Assessment for Carcinogenic Effects (1986-Present)*, 2018.
- 6 IARC, List of Classifications – IARC Monographs on the Identification of Carcinogenic Hazards to Humans, <https://monographs.iarc.fr/list-of-classifications>, (accessed 20 December 2020).
- 7 European Commission, Chemicals - Environment - European Commission, [https://ec.europa.eu/environment/chemicals/endocrine/strategy/substances\\_en.htm](https://ec.europa.eu/environment/chemicals/endocrine/strategy/substances_en.htm), (accessed 20 December 2020).
- 8 A. J. Williams, C. M. Grulke, J. Edwards, A. D. McEachran, K. Mansouri, N. C. Baker, G. Patlewicz, I. Shah, J. F. Wambaugh, R. S. Judson and A. M. Richard, *J. Cheminform.*, 2017, **9**, 1–27.
- 9 S. A. Montzka, S. Reimann, A. Engel, K. Krüger, S. O’Doherty, W. T. Sturges, D. Blake, M. Dorf, P. Fraser, L. Froidevaux, K. Jucks, K. Kreher, M. J. Kurylo, A. Mellouki, J. Miller, O.-J. Nielsen, V. L. Orkin, R. G. Prinn, R. Rhew, M. L. Santee, A. Stohl and D. Verdonik, *Sci. Assess. Ozone Deplet. 2010*, 2011, Chapter 1.
- 10 Rotterdam Convention, Annex III Chemicals, <http://www.pic.int/TheConvention/Chemicals/AnnexIIIChemicals>, (accessed 20 December 2020).
- 11 United Nations Environment Programme, Listing of POPs in the Stockholm Convention, <http://chm.pops.int/TheConvention/ThePOPs/ListingofPOPs>, (accessed 20 December 2020).
